# Supplementary material
Source: PubMed Central journal article supplement (PMC4006301)
Supplement: NIHMS574383-supplement-10822_2014_9718_MOESM1_ESM.pdf [file NIHMS574383-supplement-10822_2014_9718_MOESM1_ESM.pdf]

# Supporting Information: Blind prediction of solvation free energies from the SAMPL4 challenge

David L. Mobley, Karisa L. Wymer, Nathan M. Lim, and J. Peter Guthrie

Received: date / Accepted: date

**Abstract** Here, we provide Supporting Information associated with our main article – specifically, we provide full submission data for all submissions for which participants were willing to share the data; this includes predicted values, as well as method descriptions. We also provide the SAMPL challenge inputs, and error/analysis statistics for the “blind” and “supplementary” components separately. We also give SMILES strings and IUPAC names for the compounds, provide the mean error by compound, and give tables showing results of our *t*-test experiments.

**Keywords** hydration free energy · transfer free energy · SAMPL · free energy calculation

## 1 Supporting Materials

Statistics for the blind and supplementary subsets are shown in Tables 1 and 2, respectively.

---

D. Mobley · K. Wymer · N. Lim  
Department of Pharmaceutical Sciences  
and Department of Chemistry  
147 Bison Modular  
University of California, Irvine  
Irvine, CA 92697  
Tel.: 949-824-6383  
Fax: 949-824-2949  
E-mail: dmobley@mobleylab.org

D. Mobley  
Department of Chemistry  
University of New Orleans  
2000 Lakeshore Drive  
New Orleans, LA 70148

J. P. Guthrie  
Department of Chemistry  
University of Western Ontario  
London, ON, Canada

Experimental values and uncertainties, as used for the analysis here, are shown in Table 3.

Results from applying Student’s paired *t*-test to assess whether differences between methods are significant are shown in Table 4 for comparison to one of the top methods, submission 145, and in Tables 5 and 6 for control submissions 014 and 015, respectively.

Additional supporting information, in the form of input files provided to participants, and participant submissions (predictions and method descriptions, at least from those participants who gave us permission to share this information) are provided as a supporting archive file.

| ID  | avg. err.    | RMS          | AUE          | tau         | R           |
|-----|--------------|--------------|--------------|-------------|-------------|
| 004 | 0.37 ± 0.34  | 1.55 ± 0.35  | 1.15 ± 0.23  | 0.62 ± 0.07 | 0.94 ± 0.02 |
| 005 | -0.38 ± 0.28 | 1.30 ± 0.22  | 1.02 ± 0.18  | 0.68 ± 0.06 | 0.96 ± 0.02 |
| 014 | 0.58 ± 0.55  | 2.50 ± 0.38  | 1.90 ± 0.35  | 0.31 ± 0.11 | 0.87 ± 0.22 |
| 015 | 0.61 ± 0.51  | 2.47 ± 0.42  | 1.93 ± 0.33  | 0.42 ± 0.10 | 0.84 ± 0.21 |
| 137 | 2.59 ± 0.46  | 3.32 ± 0.49  | 2.84 ± 0.38  | 0.65 ± 0.06 | 0.88 ± 0.03 |
| 138 | 0.87 ± 0.44  | 2.14 ± 0.33  | 1.74 ± 0.28  | 0.50 ± 0.07 | 0.91 ± 0.05 |
| 141 | -0.30 ± 0.39 | 1.85 ± 0.43  | 1.34 ± 0.28  | 0.70 ± 0.06 | 0.93 ± 0.02 |
| 145 | -0.63 ± 0.29 | 1.47 ± 0.35  | 1.05 ± 0.22  | 0.73 ± 0.05 | 0.98 ± 0.02 |
| 149 | 0.43 ± 0.35  | 1.54 ± 0.19  | 1.28 ± 0.19  | 0.74 ± 0.06 | 0.97 ± 0.05 |
| 152 | -3.11 ± 0.39 | 3.57 ± 0.37  | 3.17 ± 0.36  | 0.68 ± 0.10 | 0.94 ± 0.18 |
| 153 | -2.23 ± 0.61 | 3.55 ± 0.56  | 2.57 ± 0.53  | 0.66 ± 0.06 | 0.89 ± 0.12 |
| 158 | -2.74 ± 2.67 | 12.88 ± 2.59 | 9.58 ± 1.83  | 0.76 ± 0.05 | 0.56 ± 0.09 |
| 166 | -0.42 ± 0.36 | 1.68 ± 0.24  | 1.38 ± 0.21  | 0.62 ± 0.07 | 0.93 ± 0.04 |
| 167 | 1.04 ± 0.36  | 1.92 ± 0.35  | 1.36 ± 0.29  | 0.46 ± 0.10 | 0.93 ± 0.17 |
| 168 | 1.00 ± 0.41  | 2.06 ± 0.33  | 1.55 ± 0.29  | 0.42 ± 0.10 | 0.91 ± 0.18 |
| 169 | -0.45 ± 0.49 | 2.30 ± 0.26  | 1.91 ± 0.27  | 0.31 ± 0.09 | 0.86 ± 0.09 |
| 178 | 0.47 ± 0.28  | 1.34 ± 0.21  | 1.10 ± 0.17  | 0.70 ± 0.07 | 0.96 ± 0.02 |
| 179 | 0.46 ± 0.33  | 1.54 ± 0.29  | 1.17 ± 0.22  | 0.70 ± 0.07 | 0.94 ± 0.03 |
| 180 | -0.84 ± 0.35 | 1.77 ± 0.32  | 1.29 ± 0.27  | 0.68 ± 0.07 | 0.96 ± 0.03 |
| 181 | -0.53 ± 0.28 | 1.35 ± 0.25  | 1.00 ± 0.20  | 0.69 ± 0.08 | 0.96 ± 0.03 |
| 189 | 1.01 ± 0.59  | 2.89 ± 0.74  | 1.92 ± 0.47  | 0.41 ± 0.10 | 0.83 ± 0.14 |
| 196 | -2.14 ± 2.72 | 12.46 ± 2.62 | 9.45 ± 1.82  | 0.74 ± 0.05 | 0.51 ± 0.09 |
| 197 | -2.19 ± 2.85 | 13.63 ± 2.44 | 10.47 ± 1.85 | 0.70 ± 0.05 | 0.41 ± 0.08 |
| 529 | 0.61 ± 0.58  | 2.77 ± 0.53  | 1.98 ± 0.42  | 0.46 ± 0.08 | 0.81 ± 0.06 |
| 530 | -0.09 ± 0.53 | 2.32 ± 0.45  | 1.72 ± 0.34  | 0.45 ± 0.13 | 0.85 ± 0.13 |
| 531 | 0.41 ± 0.64  | 2.82 ± 0.45  | 2.25 ± 0.40  | 0.43 ± 0.14 | 0.80 ± 0.18 |
| 532 | -0.34 ± 0.42 | 1.91 ± 0.30  | 1.57 ± 0.25  | 0.50 ± 0.14 | 0.90 ± 0.24 |
| 533 | -0.60 ± 0.33 | 1.60 ± 0.22  | 1.33 ± 0.21  | 0.62 ± 0.11 | 0.95 ± 0.13 |
| 534 | 0.84 ± 0.63  | 3.01 ± 1.01  | 1.70 ± 0.53  | 0.44 ± 0.16 | 0.85 ± 0.21 |
| 542 | 0.15 ± 0.42  | 1.86 ± 0.38  | 1.30 ± 0.29  | 0.64 ± 0.08 | 0.94 ± 0.07 |
| 543 | 0.55 ± 0.40  | 1.82 ± 0.39  | 1.30 ± 0.27  | 0.57 ± 0.08 | 0.93 ± 0.07 |
| 544 | 0.59 ± 0.30  | 1.43 ± 0.28  | 1.07 ± 0.21  | 0.70 ± 0.06 | 0.96 ± 0.02 |
| 545 | 1.67 ± 0.54  | 3.07 ± 0.51  | 2.49 ± 0.40  | 0.41 ± 0.10 | 0.81 ± 0.11 |
| 548 | 2.44 ± 0.54  | 3.43 ± 0.68  | 2.47 ± 0.53  | 0.36 ± 0.10 | 0.84 ± 0.08 |
| 561 | 0.06 ± 0.23  | 1.00 ± 0.17  | 0.78 ± 0.14  | 0.79 ± 0.05 | 0.98 ± 0.04 |
| 562 | 0.62 ± 0.39  | 1.80 ± 0.23  | 1.46 ± 0.23  | 0.67 ± 0.06 | 0.92 ± 0.03 |
| 563 | 0.17 ± 0.54  | 2.51 ± 0.51  | 1.89 ± 0.36  | 0.40 ± 0.08 | 0.82 ± 0.07 |
| 564 | 0.92 ± 0.62  | 2.94 ± 0.64  | 2.11 ± 0.46  | 0.28 ± 0.11 | 0.79 ± 0.11 |
| 565 | 0.66 ± 0.30  | 1.49 ± 0.33  | 1.01 ± 0.24  | 0.79 ± 0.05 | 0.96 ± 0.02 |
| 566 | 0.53 ± 0.30  | 1.40 ± 0.32  | 0.96 ± 0.23  | 0.74 ± 0.05 | 0.96 ± 0.02 |
| 567 | -0.62 ± 0.63 | 2.99 ± 0.69  | 2.12 ± 0.44  | 0.58 ± 0.08 | 0.75 ± 0.05 |
| 568 | -0.86 ± 0.32 | 1.65 ± 0.26  | 1.25 ± 0.24  | 0.72 ± 0.05 | 0.95 ± 0.02 |
| 569 | -3.03 ± 0.61 | 4.14 ± 0.52  | 3.42 ± 0.50  | 0.60 ± 0.08 | 0.80 ± 0.06 |
| 570 | -2.57 ± 0.43 | 3.23 ± 0.52  | 2.59 ± 0.41  | 0.76 ± 0.06 | 0.91 ± 0.05 |
| 572 | -0.65 ± 0.65 | 2.84 ± 0.68  | 1.99 ± 0.45  | 0.59 ± 0.08 | 0.78 ± 0.04 |
| 573 | -0.89 ± 0.28 | 1.49 ± 0.22  | 1.20 ± 0.20  | 0.72 ± 0.06 | 0.96 ± 0.02 |
| 575 | -0.27 ± 0.31 | 1.45 ± 0.21  | 1.20 ± 0.19  | 0.63 ± 0.07 | 0.95 ± 0.04 |
| 581 | 0.37 ± 0.39  | 1.77 ± 0.56  | 1.14 ± 0.30  | 0.71 ± 0.10 | 0.93 ± 0.04 |
| 582 | 1.40 ± 0.77  | 3.73 ± 0.65  | 2.79 ± 0.54  | 0.50 ± 0.08 | 0.83 ± 0.05 |

**Table 1** Statistics for SAMPL4 hydration prediction. Shown are statistics for each submission, by submission ID. We report average error, RMS error, average unsigned error, Kendall tau, and Pearson R. Units, when applicable, are kcal/mol. Submission 575 was apparently affected with a propagation bug when running the molecular dynamics simulations, introducing errors.

| ID  | avg. err.    | RMS         | AUE         | tau         | R           |
|-----|--------------|-------------|-------------|-------------|-------------|
| 004 | -0.06 ± 0.27 | 1.26 ± 0.14 | 1.07 ± 0.14 | 0.68 ± 0.07 | 0.95 ± 0.02 |
| 005 | -0.46 ± 0.22 | 1.14 ± 0.16 | 0.92 ± 0.14 | 0.83 ± 0.06 | 0.98 ± 0.02 |
| 014 | 1.53 ± 0.62  | 3.46 ± 0.77 | 1.90 ± 0.57 | 0.43 ± 0.11 | 0.41 ± 0.22 |
| 015 | 1.35 ± 0.64  | 3.52 ± 0.75 | 2.10 ± 0.54 | 0.31 ± 0.10 | 0.31 ± 0.21 |
| 137 | 1.95 ± 0.31  | 2.49 ± 0.26 | 2.18 ± 0.24 | 0.65 ± 0.06 | 0.91 ± 0.03 |
| 138 | 0.23 ± 0.38  | 1.87 ± 0.18 | 1.60 ± 0.19 | 0.65 ± 0.07 | 0.90 ± 0.05 |
| 141 | 0.12 ± 0.22  | 1.04 ± 0.16 | 0.85 ± 0.13 | 0.80 ± 0.06 | 0.97 ± 0.02 |
| 145 | -0.29 ± 0.20 | 1.00 ± 0.17 | 0.73 ± 0.14 | 0.83 ± 0.05 | 0.98 ± 0.02 |
| 149 | -0.30 ± 0.29 | 1.39 ± 0.31 | 0.99 ± 0.20 | 0.75 ± 0.06 | 0.92 ± 0.05 |
| 152 | -3.78 ± 1.13 | 6.68 ± 1.31 | 4.75 ± 0.97 | 0.23 ± 0.10 | 0.21 ± 0.18 |
| 153 | -2.45 ± 0.71 | 4.25 ± 0.52 | 3.47 ± 0.50 | 0.44 ± 0.06 | 0.55 ± 0.12 |
| 158 | 3.21 ± 1.24  | 7.19 ± 1.78 | 5.33 ± 0.97 | 0.58 ± 0.05 | 0.35 ± 0.09 |
| 166 | -0.36 ± 0.29 | 1.49 ± 0.21 | 1.12 ± 0.19 | 0.78 ± 0.07 | 0.91 ± 0.04 |
| 167 | -1.58 ± 1.08 | 5.77 ± 1.79 | 2.80 ± 0.97 | 0.51 ± 0.10 | 0.45 ± 0.17 |
| 168 | -1.57 ± 1.09 | 5.80 ± 1.78 | 2.76 ± 0.97 | 0.52 ± 0.10 | 0.44 ± 0.18 |
| 169 | -0.60 ± 0.44 | 2.33 ± 0.44 | 1.62 ± 0.33 | 0.62 ± 0.09 | 0.83 ± 0.09 |
| 178 | 0.07 ± 0.33  | 1.65 ± 0.17 | 1.42 ± 0.17 | 0.66 ± 0.07 | 0.94 ± 0.02 |
| 179 | 0.07 ± 0.30  | 1.55 ± 0.19 | 1.27 ± 0.18 | 0.64 ± 0.07 | 0.92 ± 0.03 |
| 180 | -0.64 ± 0.38 | 2.10 ± 0.22 | 1.74 ± 0.22 | 0.68 ± 0.07 | 0.94 ± 0.03 |
| 181 | -0.46 ± 0.32 | 1.70 ± 0.17 | 1.43 ± 0.18 | 0.67 ± 0.08 | 0.93 ± 0.03 |
| 189 | -0.31 ± 0.51 | 2.61 ± 0.45 | 1.97 ± 0.35 | 0.58 ± 0.10 | 0.69 ± 0.14 |
| 196 | 3.14 ± 1.29  | 7.15 ± 1.80 | 5.34 ± 0.94 | 0.60 ± 0.05 | 0.32 ± 0.09 |
| 197 | 3.35 ± 1.32  | 7.30 ± 1.76 | 5.53 ± 0.94 | 0.58 ± 0.05 | 0.31 ± 0.08 |
| 529 | -0.02 ± 0.39 | 2.04 ± 0.24 | 1.69 ± 0.24 | 0.73 ± 0.08 | 0.90 ± 0.06 |
| 542 | -0.30 ± 0.39 | 1.92 ± 0.43 | 1.29 ± 0.29 | 0.69 ± 0.08 | 0.86 ± 0.07 |
| 543 | 0.20 ± 0.35  | 1.79 ± 0.30 | 1.40 ± 0.22 | 0.72 ± 0.08 | 0.86 ± 0.07 |
| 544 | 0.20 ± 0.23  | 1.11 ± 0.13 | 0.94 ± 0.12 | 0.73 ± 0.06 | 0.96 ± 0.02 |
| 545 | 0.53 ± 0.56  | 2.87 ± 0.52 | 2.17 ± 0.37 | 0.51 ± 0.10 | 0.70 ± 0.11 |
| 548 | 0.36 ± 0.44  | 2.15 ± 0.27 | 1.77 ± 0.25 | 0.67 ± 0.10 | 0.90 ± 0.08 |
| 561 | -0.44 ± 0.36 | 1.93 ± 0.46 | 1.32 ± 0.27 | 0.74 ± 0.05 | 0.91 ± 0.04 |
| 562 | 0.72 ± 0.30  | 1.57 ± 0.13 | 1.44 ± 0.14 | 0.70 ± 0.06 | 0.92 ± 0.03 |
| 563 | -0.43 ± 0.48 | 2.47 ± 0.36 | 1.85 ± 0.31 | 0.51 ± 0.08 | 0.78 ± 0.07 |
| 564 | -0.28 ± 0.53 | 2.71 ± 0.38 | 2.28 ± 0.30 | 0.54 ± 0.11 | 0.80 ± 0.11 |
| 565 | 0.33 ± 0.22  | 1.13 ± 0.13 | 0.95 ± 0.13 | 0.78 ± 0.05 | 0.96 ± 0.02 |
| 566 | 0.19 ± 0.22  | 1.08 ± 0.12 | 0.93 ± 0.12 | 0.78 ± 0.05 | 0.96 ± 0.02 |
| 567 | -0.75 ± 0.28 | 1.64 ± 0.16 | 1.41 ± 0.16 | 0.56 ± 0.08 | 0.93 ± 0.05 |
| 568 | -0.87 ± 0.25 | 1.48 ± 0.21 | 1.17 ± 0.19 | 0.75 ± 0.05 | 0.95 ± 0.02 |
| 569 | -2.93 ± 0.67 | 4.49 ± 0.87 | 3.11 ± 0.63 | 0.50 ± 0.08 | 0.77 ± 0.06 |
| 570 | -2.40 ± 0.46 | 3.30 ± 0.63 | 2.48 ± 0.44 | 0.69 ± 0.06 | 0.85 ± 0.05 |
| 572 | -0.71 ± 0.29 | 1.60 ± 0.16 | 1.35 ± 0.17 | 0.57 ± 0.08 | 0.93 ± 0.04 |
| 573 | -0.81 ± 0.24 | 1.43 ± 0.20 | 1.12 ± 0.18 | 0.75 ± 0.06 | 0.95 ± 0.02 |
| 575 | -1.25 ± 0.44 | 2.51 ± 0.43 | 1.90 ± 0.33 | 0.65 ± 0.07 | 0.88 ± 0.04 |
| 582 | -0.65 ± 0.99 | 5.04 ± 0.98 | 3.62 ± 0.71 | 0.78 ± 0.08 | 0.93 ± 0.05 |

**Table 2** Statistics for SAMPL4 hydration prediction. Shown are statistics for each submission, by submission ID. We report average error, RMS error, average unsigned error, Kendall tau, and Pearson R. Units, when applicable, are kcal/mol. Submission 575 was apparently affected with a propagation bug when running the molecular dynamics simulations, introducing errors.

| ID         | SMILES                                          | name                                       | MW      | $\Delta G_{hyd}$ | uncertainty |
|------------|-------------------------------------------------|--------------------------------------------|---------|------------------|-------------|
| SAMPL4.047 | <chem>O=C1c2c(cccc2NCCO)C(=O)c2c1cccc2</chem>   | 1-(2-hydroxyethylamino)-9,10-anthraquinone | 267.28  | -14.21           | 1.1         |
| SAMPL4.020 | <chem>C=C(c1ccccc1)c2ccccc2</chem>              | 1,1-diphenylethene                         | 180.245 | -2.78            | 0.1         |
| SAMPL4.005 | <chem>O(C)c1ccccc1OC</chem>                     | 1,2-dimethoxybenzene                       | 138.17  | -5.33            | 0.1         |
| SAMPL4.028 | <chem>O(N(=O)=O)C(CCON(=O)=O)C</chem>           | 1,3-bis-(nitrooxy)butane                   | 180.12  | -4.29            | 0.39        |
| SAMPL4.027 | <chem>O(N(=O)=O)C(CCON(=O)=O)</chem>            | 1,3-bis-(nitrooxy)propane                  | 166.09  | -4.8             | 0.39        |
| SAMPL4.048 | <chem>O=C1c2c(C(=O)c3c1cccc3)c(N)ccc2N</chem>   | 1,4-diamino-9,10-anthraquinone             | 238.25  | -11.85           | 0.35        |
| SAMPL4.044 | <chem>O1CCOCC1</chem>                           | 1,4-dioxane                                | 88.11   | -5.08            | 0.1         |
| SAMPL4.051 | <chem>Nc1c2c(c(cc1)O)C(=O)c3c(cccc3)C2=O</chem> | 1-amino-4-hydroxy-9,10-anthraquinone       | 239.23  | -9.53            | 0.28        |
| SAMPL4.046 | <chem>Nc1c2c(ccc1)C(=O)c3c(cccc3)C2=O</chem>    | 1-amino-9,10-anthraquinone                 | 223.23  | -9.44            | 0.74        |
| SAMPL4.021 | <chem>c1(ccccc1)Cn2cnc2</chem>                  | 1-benzylimidazole                          | 159.214 | -7.63            | 0.12        |
| SAMPL4.025 | <chem>O(CC(O)C)CCCC</chem>                      | 1-butoxy-2-propanol                        | 132.2   | -5.73            | 0.15        |
| SAMPL4.039 | <chem>c1cccc(C)c1CC</chem>                      | 1-ethyl-2-methylbenzene                    | 120.2   | -0.85            | 0.1         |
| SAMPL4.009 | <chem>Clc1c(C=O)c(Cl)c(OC)c(O)c1OC</chem>       | 2,6-dichlorosyringaldehyde                 | 251.06  | -8.24            | 0.76        |
| SAMPL4.033 | <chem>O(C)c1cccc(OC)c1O</chem>                  | 2,6-dimethoxyphenol                        | 154.16  | -6.96            | 0.1         |
| SAMPL4.045 | <chem>O=C1c2c(ccc(N)c2)C(=O)c2c1cccc2</chem>    | 2-amino-9,10-anthraquinone                 | 223.23  | -11.53           | 0.29        |
| SAMPL4.011 | <chem>Clc1c(OC)c(O)c(OC)cc1C=O</chem>           | 2-chlorosyringaldehyde                     | 216.62  | -7.78            | 0.77        |
| SAMPL4.026 | <chem>C(C)OCCOC(=O)C</chem>                     | 2-ethoxyethyl acetate                      | 132.16  | -5.31            | 0.1         |
| SAMPL4.036 | <chem>Oc1ccccc1CC</chem>                        | 2-ethylphenol                              | 122.17  | -5.66            | 0.1         |
| SAMPL4.035 | <chem>Oc1ccccc1C=O</chem>                       | 2-hydroxybenzaldehyde                      | 122.12  | -4.68            | 0.1         |
| SAMPL4.037 | <chem>COc1c(cccc1)O</chem>                      | 2-methoxyphenol                            | 124.14  | -5.94            | 0.1         |
| SAMPL4.038 | <chem>O=Cc1ccccc1C</chem>                       | 2-methylbenzaldehyde                       | 120.15  | -3.93            | 0.1         |
| SAMPL4.032 | <chem>Clc1cc(O)ccc1Cl</chem>                    | 3,4-dichlorophenol                         | 163     | -7.29            | 0.1         |
| SAMPL4.010 | <chem>Clc1cc(Cl)c(OC)c(O)c1OC</chem>            | 3,5-dichlorosyringol                       | 223.05  | -6.24            | 0.38        |
| SAMPL4.034 | <chem>Cc1cc(c(cc1)O)OC</chem>                   | 4-methyl-2-methoxyphenol                   | 138.17  | -5.8             | 0.1         |
| SAMPL4.006 | <chem>Oc1ccc(cc1OC)CCC</chem>                   | 4-propylguaiaicol                          | 166.217 | -5.26            | 0.18        |
| SAMPL4.019 | <chem>C1c2c(Cc3c1cccc3)cccc2</chem>             | 9,10-dihydroanthracene                     | 180.25  | -3.78            | 0.1         |
| SAMPL4.024 | <chem>CN(C)CCC=C1c2ccccc2CCc3c1cccc3</chem>     | amitriptyline                              | 277.41  | -7.43            | 0.6         |
| SAMPL4.050 | <chem>c12c(cc3c(c1)cccc3)cccc2</chem>           | anthracene                                 | 178.23  | -4.14            | 0.1         |
| SAMPL4.049 | <chem>O1c2c(Oc3c1cccc3)cccc2</chem>             | dibenzo-p-dioxin                           | 184.19  | -3.16            | 0.1         |
| SAMPL4.013 | <chem>OC1CC(CC=C1C)C(C)=C</chem>                | carveol                                    | 152.24  | -4.44            | 0.43        |
| SAMPL4.043 | <chem>C1CCC=CC1</chem>                          | cyclohexene                                | 82.15   | 0.14             | 0.1         |
| SAMPL4.012 | <chem>CC1C(=O)CC(CC1)C(=C)C</chem>              | dihydrocarvone                             | 152.238 | -3.75            | 0.21        |
| SAMPL4.023 | <chem>c1ccccc1C(c2ccccc2)OCCN(C)C</chem>        | diphenhydramine                            | 255.363 | -9.34            | 0.62        |
| SAMPL4.052 | <chem>O(c1ccccc1)c1ccccc1</chem>                | diphenyl ether                             | 170.21  | -2.87            | 0.69        |
| SAMPL4.004 | <chem>OC\C=C(\CCC=C(C)C)/C</chem>               | geraniol                                   | 154.25  | -4.45            | 0.24        |
| SAMPL4.030 | <chem>O(C(=O)C)CCCCCC</chem>                    | hexyl acetate                              | 144.21  | -2.29            | 0.12        |
| SAMPL4.029 | <chem>O([N+](=O)[O-])CCCCCC</chem>              | hexyl nitrate                              | 147.17  | -1.66            | 0.1         |
| SAMPL4.002 | <chem>CC(=CCCC(C)(C=C)OC(=O)C)C</chem>          | linalyl acetate                            | 196.292 | -2.49            | 0.85        |
| SAMPL4.001 | <chem>C(C(C(C(C(O)O)O)O)O)O</chem>              | mannitol                                   | 182.178 | -23.62           | 0.32        |
| SAMPL4.016 | <chem>OC1CC(CCC1C(C)C)C</chem>                  | menthol                                    | 156.27  | -3.2             | 0.27        |
| SAMPL4.017 | <chem>CC1CCC(C(=O)C1)C(C)C</chem>               | menthone                                   | 154.25  | -2.53            | 0.25        |
| SAMPL4.022 | <chem>Cc1c(cccc1Nc2ccccc2C(=O)O)C</chem>        | mefenamic acid                             | 241.29  | -6.78            | 0.1         |
| SAMPL4.003 | <chem>CC(=CCCC(=CCO)C)C</chem>                  | nerol                                      | 154.254 | -4.78            | 0.25        |
| SAMPL4.014 | <chem>O=C\C1=C\CC(\C(=C)C)CC1</chem>            | l-perillaldehyde                           | 150.22  | -4.09            | 0.17        |
| SAMPL4.041 | <chem>N1CCCCC1</chem>                           | piperidine                                 | 85.15   | -5.05            | 0.1         |
| SAMPL4.015 | <chem>CC1=CC(=O)C(CC1)C(C)C</chem>              | piperitone                                 | 152.238 | -4.51            | 0.1         |
| SAMPL4.042 | <chem>O1CCCCC1</chem>                           | tetrahydropyran                            | 86.13   | -3.13            | 0.1         |

**Table 3** Compound identifiers, SMILES strings, molecular weights, hydration free energies, and uncertainties, as provided by J. Peter Guthrie for analysis of the SAMPL challenge. This data was provided after the submission deadline, with updates as described in the main text. Units of free energy are kcal/mol.

| SID | t     | p       |
|-----|-------|---------|
| 168 | -0.03 | 0.98    |
| 167 | -0.04 | 0.96    |
| 005 | -0.07 | 0.94    |
| 181 | 0.18  | 0.85    |
| 166 | -0.20 | 0.84    |
| 169 | 0.25  | 0.81    |
| 158 | -0.66 | 0.51    |
| 567 | 0.67  | 0.51    |
| 572 | 0.67  | 0.5     |
| 563 | -0.69 | 0.49    |
| 561 | -0.78 | 0.44    |
| 196 | -0.84 | 0.41    |
| 197 | -0.84 | 0.41    |
| 180 | 0.91  | 0.37    |
| 582 | -1.04 | 0.3     |
| 542 | -1.04 | 0.3     |
| 575 | 1.11  | 0.27    |
| 141 | -1.36 | 0.18    |
| 564 | -1.57 | 0.12    |
| 189 | -1.66 | 0.1     |
| 573 | 1.67  | 0.1     |
| 568 | 1.67  | 0.1     |
| 149 | -1.71 | 0.094   |
| 529 | -1.80 | 0.079   |
| 004 | -2.16 | 0.036   |
| 179 | -2.42 | 0.019   |
| 178 | -2.48 | 0.017   |
| 543 | -2.55 | 0.014   |
| 138 | -2.89 | 0.0059  |
| 015 | -3.16 | 0.0028  |
| 566 | -3.23 | 0.0023  |
| 544 | -3.31 | 0.0018  |
| 545 | -3.34 | 0.0016  |
| 014 | -3.40 | 0.0014  |
| 565 | -3.74 | 0.00049 |
| 153 | 3.84  | 0.00036 |
| 562 | -3.94 | 0.00027 |
| 548 | -4.30 | 8.6e-05 |
| 152 | 4.65  | 2.7e-05 |
| 569 | 5.10  | 5.9e-06 |
| 570 | 5.70  | 7.6e-07 |
| 137 | -8.41 | 6.3e-11 |

**Table 4** Student's *t*-test results comparing errors for submission 145 to that from other submissions. Shown are the *t*-statistic and p-value.

| SID | t     | p       |
|-----|-------|---------|
| 545 | 0.11  | 0.91    |
| 015 | 0.14  | 0.89    |
| 197 | 0.14  | 0.89    |
| 196 | 0.21  | 0.83    |
| 548 | -0.33 | 0.74    |
| 158 | 0.36  | 0.72    |
| 562 | 0.90  | 0.37    |
| 582 | 1.07  | 0.29    |
| 138 | 1.16  | 0.25    |
| 565 | 1.37  | 0.18    |
| 189 | 1.42  | 0.16    |
| 564 | 1.43  | 0.16    |
| 543 | 1.52  | 0.14    |
| 529 | 1.54  | 0.13    |
| 544 | 1.60  | 0.12    |
| 566 | 1.67  | 0.1     |
| 178 | 1.80  | 0.078   |
| 179 | 1.81  | 0.077   |
| 168 | 1.94  | 0.059   |
| 167 | 1.94  | 0.058   |
| 004 | 2.07  | 0.044   |
| 137 | -2.26 | 0.029   |
| 563 | 2.27  | 0.028   |
| 149 | 2.28  | 0.027   |
| 542 | 2.38  | 0.021   |
| 141 | 2.48  | 0.017   |
| 561 | 2.75  | 0.0084  |
| 169 | 3.05  | 0.0038  |
| 166 | 3.11  | 0.0031  |
| 567 | 3.35  | 0.0016  |
| 181 | 3.36  | 0.0015  |
| 005 | 3.37  | 0.0015  |
| 572 | 3.39  | 0.0014  |
| 145 | 3.40  | 0.0014  |
| 180 | 3.67  | 0.00062 |
| 575 | 3.75  | 0.00048 |
| 568 | 4.26  | 9.7e-05 |
| 573 | 4.27  | 9.4e-05 |
| 153 | 5.49  | 1.6e-06 |
| 152 | 6.04  | 2.3e-07 |
| 569 | 6.48  | 5e-08   |
| 570 | 6.80  | 1.6e-08 |

**Table 5** Student's *t*-test results comparing errors for control submission 014 to that from other submissions. Shown are the *t*-statistic and p-value.

| SID | t     | p       |
|-----|-------|---------|
| 545 | -0.03 | 0.97    |
| 197 | 0.09  | 0.93    |
| 014 | -0.14 | 0.89    |
| 196 | 0.16  | 0.88    |
| 158 | 0.30  | 0.77    |
| 548 | -0.48 | 0.63    |
| 562 | 0.71  | 0.48    |
| 582 | 0.95  | 0.35    |
| 138 | 0.98  | 0.33    |
| 565 | 1.16  | 0.25    |
| 189 | 1.25  | 0.22    |
| 564 | 1.27  | 0.21    |
| 543 | 1.32  | 0.19    |
| 529 | 1.37  | 0.18    |
| 544 | 1.39  | 0.17    |
| 566 | 1.45  | 0.15    |
| 178 | 1.59  | 0.12    |
| 179 | 1.60  | 0.12    |
| 168 | 1.82  | 0.076   |
| 167 | 1.82  | 0.075   |
| 004 | 1.86  | 0.069   |
| 149 | 2.06  | 0.045   |
| 563 | 2.09  | 0.042   |
| 542 | 2.18  | 0.034   |
| 141 | 2.26  | 0.028   |
| 137 | -2.40 | 0.021   |
| 561 | 2.53  | 0.015   |
| 169 | 2.85  | 0.0064  |
| 166 | 2.89  | 0.0058  |
| 005 | 3.12  | 0.0031  |
| 181 | 3.13  | 0.003   |
| 567 | 3.15  | 0.0028  |
| 145 | 3.16  | 0.0028  |
| 572 | 3.19  | 0.0025  |
| 180 | 3.44  | 0.0012  |
| 575 | 3.54  | 0.00093 |
| 568 | 4.01  | 0.00022 |
| 573 | 4.01  | 0.00021 |
| 153 | 5.30  | 3e-06   |
| 152 | 5.89  | 4e-07   |
| 569 | 6.29  | 9.8e-08 |
| 570 | 6.56  | 3.9e-08 |

**Table 6** Student's *t*-test results comparing errors for control submission 015 to that from other submissions. Shown are the *t*-statistic and p-value.
